# Supplementary material
Source: PubMed Central journal article supplement (PMC6166788)
Supplement: NIHMS78835-supplement-Supplementary_tables.pdf [file NIHMS78835-supplement-Supplementary_tables.pdf]

## **Supplementary Information**

### **Combination therapy with anti-HIV-1 antibodies maintains viral suppression**

#### **Supplementary Tables**

|                       |                                                                        |
|-----------------------|------------------------------------------------------------------------|
| Supplementary Table 1 | Antibody sensitivity pre-screening of bulk outgrowth-derived viruses   |
| Supplementary Table 2 | HIV-1 RNA levels, CD4 <sup>+</sup> T cell counts and bNAb serum levels |
| Supplementary Table 3 | Adverse events reported during 30 weeks of study follow-up             |
| Supplementary Table 4 | Virus neutralization by 3BNC117 and 10-1074                            |
| Supplementary Table 5 | Pre-Infusion IgG neutralizing activity                                 |

Supplementary Table 1. Antibody sensitivity pre-screening of bulk outgrowth-derived viruses

| Study ID | Pre-Screen ID | 3BNC117 |        | 10-1074 |        | VRC01  |        | PGT121 |        | Pre-Screen ID | 3BNC117 |        | 10-1074 |        | VRC01  |        | PGT121 |        | µg/ml      |
|----------|---------------|---------|--------|---------|--------|--------|--------|--------|--------|---------------|---------|--------|---------|--------|--------|--------|--------|--------|------------|
|          |               | IC50    | IC80   | IC50    | IC80   | IC50   | IC80   | IC50   | IC80   |               | IC50    | IC80   | IC50    | IC80   | IC50   | IC80   | IC50   | IC80   |            |
| 9241     | B426          | 0.809   | 2.212  | 0.090   | 0.243  | 19.563 | >20    | 0.038  | 0.142  | 0758          | >25     | >25    | 4.030   | 16.099 | NT     | NT     | NT     | NT     | < 0.5      |
| 9242     | B361          | 0.160   | 0.433  | 0.144   | 0.389  | NT     | NT     | NT     | NT     | B322          | 0.356   | 0.985  | 0.372   | 1.001  | NT     | NT     | NT     | NT     | 0.5 - 1.0  |
| 9243     | B221          | 0.641   | 2.913  | 0.072   | 0.241  | NT     | NT     | NT     | NT     | B324          | 2.458   | 13.304 | 9.247   | >20    | NT     | NT     | NT     | NT     | 1.0 - 2.0  |
| 9244     | B62           | 0.277   | 0.966  | 0.025   | 0.068  | NT     | NT     | NT     | NT     | B332          | 0.114   | 0.315  | 0.053   | 0.149  | NT     | NT     | NT     | NT     | 2.0 - 5.0  |
| 9245     | B14           | 0.417   | 1.423  | 0.038   | 0.089  | NT     | NT     | NT     | NT     | B333          | 0.467   | 1.206  | 0.580   | 1.507  | NT     | NT     | NT     | NT     | 5.0 - 20.0 |
| 9246     | B364          | 0.144   | 0.387  | 0.040   | 0.105  | 0.357  | 0.920  | 0.042  | 0.112  | B339          | 5.766   | >20    | >20     | >20    | NT     | NT     | NT     | NT     | >20.0      |
| 9247     | B247          | 0.556   | 1.930  | 0.072   | 0.326  | NT     | NT     | NT     | NT     | B341          | 18.852  | >20    | 8.910   | >20    | NT     | NT     | NT     | NT     |            |
| 9248     | 0154          | 1.863   | 9.738  | 0.676   | 2.252  | 7.141  | >20    | 0.082  | 0.296  | B342          | 3.985   | 12.161 | 0.277   | 0.828  | NT     | NT     | NT     | NT     |            |
| 9249     | 0191          | 0.562   | 2.095  | 0.260   | 0.983  | NT     | NT     | NT     | NT     | B356          | >20     | >20    | 6.929   | >20    | NT     | NT     | NT     | NT     |            |
| 9250     | B432          | 0.558   | 3.174  | 0.447   | 2.644  | NT     | NT     | NT     | NT     | B358          | 9.554   | >20    | 0.914   | 3.461  | NT     | NT     | NT     | NT     |            |
| 9251     | B439          | 1.200   | 3.125  | 0.073   | 0.153  | 2.264  | 7.457  | 0.031  | 0.089  | B359          | 0.371   | 1.102  | 0.056   | 0.150  | NT     | NT     | NT     | NT     |            |
| 9252     | B442          | 0.630   | 3.074  | 0.243   | 0.640  | 3.243  | 9.639  | 0.029  | 0.113  | B360          | 0.698   | 2.325  | 2.584   | >20    | NT     | NT     | NT     | NT     |            |
| 9253     | 0230          | 0.558   | 2.644  | 0.020   | 0.317  | 1.093  | 4.851  | 0.013  | 0.124  | B362          | 10.420  | >20    | 1.307   | 10.656 | >20    | >20    | 5.497  | >20    |            |
| 9254     | 0287          | 0.142   | 0.386  | 0.085   | 0.240  | 0.488  | 2.338  | 0.110  | 0.418  | B363          | >20     | >20    | >20     | >20    | NT     | NT     | NT     | NT     |            |
| 9255     | 0115-2        | 0.324   | 0.833  | 0.006   | 0.015  | 1.335  | 6.510  | 0.006  | 0.019  | B365          | 0.427   | 1.090  | 0.264   | 0.871  | NT     | NT     | NT     | NT     |            |
|          | 0008          | 1.008   | 3.350  | >20     | >20    | 9.041  | >20    | >20    | >20    | B366          | 1.960   | 6.948  | >20     | >20    | NT     | NT     | NT     | NT     |            |
|          | 0027          | 1.158   | 4.395  | 0.167   | 0.571  | >20    | >20    | 0.035  | 0.098  | B369          | 3.841   | 11.274 | >20     | >20    | 14.672 | >20    | >20    | >20    |            |
|          | 0030          | 0.894   | 3.088  | 2.086   | >20    | 13.164 | >20    | 0.570  | 5.895  | B371          | 3.041   | 18.237 | 1.597   | 11.923 | 6.455  | >20    | 0.798  | 4.385  |            |
|          | 0047          | 1.707   | 7.549  | 0.194   | 0.872  | 2.295  | 8.332  | 0.112  | 0.545  | B372          | 3.694   | 11.404 | <20     | <20    | <20    | <20    | <20    | <20    |            |
|          | 0098          | 0.137   | 0.589  | 0.293   | 2.503  | 0.369  | 0.978  | 0.105  | 1.866  | B375          | 0.157   | 0.470  | 0.044   | 0.127  | 0.955  | 2.680  | 0.022  | 0.089  |            |
|          | 0108          | 1.061   | 3.950  | 1.224   | 5.659  | 2.935  | 13.156 | 0.098  | 0.874  | B378          | >20     | >20    | 0.732   | 5.515  | >20    | >20    | 0.357  | 1.950  |            |
|          | 0114          | 1.491   | 4.304  | 0.034   | 0.090  | 6.715  | >20    | 0.021  | 0.082  | B379          | 12.622  | >20    | 0.058   | 0.159  | 3.440  | 10.588 | 0.178  | 1.521  |            |
|          | 0170          | 0.135   | 0.399  | 0.397   | 4.889  | 0.137  | 0.526  | 0.445  | 11.333 | B381          | 0.894   | 2.435  | 2.541   | 11.160 | 5.532  | >20    | 7.303  | >20    |            |
|          | 0171          | 0.508   | 1.807  | 0.260   | 0.696  | 5.692  | 18.793 | 0.312  | 12.051 | B382          | >20     | >20    | 0.123   | 0.328  | >20    | >20    | 0.048  | 0.143  |            |
|          | 0174          | 5.233   | >20    | 0.363   | 0.985  | 2.772  | 8.438  | 0.440  | 1.623  | B388          | 4.094   | 19.473 | 0.268   | 0.723  | 5.516  | >20    | 0.056  | 0.217  |            |
|          | 0176          | 1.101   | 3.069  | 0.328   | 0.884  | 6.442  | 19.790 | 0.230  | 0.901  | B389          | >20     | >20    | 0.276   | 0.726  | 0.511  | 1.173  | 0.080  | 0.311  |            |
|          | 0181          | 3.108   | 17.962 | 0.730   | 2.654  | 0.940  | 2.552  | 0.379  | 2.175  | B394          | 1.013   | 5.932  | 0.230   | 1.211  | 2.716  | 17.545 | 0.120  | 0.492  |            |
|          | 0183          | 2.915   | >20    | 0.377   | 1.151  | 0.966  | 5.665  | 0.098  | 0.580  | B395          | 1.291   | 5.122  | >20     | >20    | 3.415  | 12.215 | >20    | >20    |            |
|          | 0188          | 1.984   | 8.533  | 0.012   | 0.038  | >20    | >20    | 0.008  | 0.021  | B396          | 0.275   | 0.954  | >20     | >20    | 1.336  | 3.017  | >20    | >20    |            |
|          | 0190          | 0.324   | 1.018  | 0.110   | 0.376  | 1.904  | 5.811  | 0.089  | 0.335  | B398          | 10.466  | >20    | >20     | >20    | 13.222 | >20    | >20    | >20    |            |
|          | 0202          | 0.119   | 0.322  | >20     | >20    | 4.211  | 16.063 | 6.874  | >20    | B399          | 1.109   | 3.743  | 1.635   | 5.438  | 2.720  | 10.202 | 1.972  | 17.751 |            |
|          | 0213          | 1.284   | 7.920  | 0.227   | 0.660  | 17.889 | >20    | 0.046  | 0.150  | B400          | 2.312   | 6.333  | 0.194   | 0.535  | 5.829  | 19.980 | 0.213  | 1.391  |            |
|          | 0215          | 1.263   | 4.638  | 0.264   | 1.312  | 15.159 | >20    | 0.163  | 2.364  | B401          | 1.530   | 5.645  | 0.946   | 3.235  | 6.686  | 18.312 | 0.112  | 0.671  |            |
|          | 0216          | 2.494   | 10.352 | 0.021   | 0.060  | 3.299  | 11.453 | 0.014  | 0.051  | B402          | 5.356   | 19.911 | 1.209   | 7.226  | 10.439 | >20    | 0.541  | >20    |            |
|          | 0228          | 1.449   | 4.156  | 1.055   | 12.452 | >20    | >20    | 2.181  | >20    | B403          | 0.676   | 1.945  | >20     | >20    | 6.907  | >20    | >20    | >20    |            |
|          | 0233          | 0.868   | 4.133  | 3.568   | >20    | >20    | >20    | 8.644  | >20    | B407          | 0.044   | 0.193  | 0.017   | 0.057  | 0.129  | 0.572  | 0.256  | 7.199  |            |
|          | 0246          | 2.425   | 7.267  | 0.940   | 3.327  | 17.328 | >20    | 0.358  | 1.412  | B410          | 2.546   | 11.641 | >20     | >20    | 9.067  | >20    | >20    | >20    |            |
|          | 0261          | 0.240   | 1.665  | 1.422   | 4.836  | 0.525  | 2.238  | 4.783  | >20    | B416          | >20     | >20    | 3.847   | 18.975 | >20    | >20    | 4.238  | >20    |            |
|          | 0285          | 3.495   | 11.715 | >20     | >20    | 16.365 | >20    | >20    | >20    | B419          | >20     | >20    | 0.043   | 0.171  | >20    | >20    | 0.026  | 0.100  |            |
|          | 0362          | 0.106   | 0.283  | 0.166   | >20    | 0.503  | 1.362  | 0.054  | 0.556  | B420          | 0.217   | 0.570  | >20     | >20    | 0.412  | 1.419  | >20    | >20    |            |
|          | 0365          | 0.597   | 1.634  | <0.01   | 0.031  | NT     | NT     | NT     | NT     | B423          | >20     | >20    | 0.251   | 0.720  | >20    | >20    | 3.076  | >20    |            |
|          | 0445          | 0.584   | 2.088  | 0.264   | 0.710  | 2.121  | 5.622  | 0.114  | 0.974  | B424          | 8.567   | >20    | 0.240   | 0.852  | 14.047 | >20    | 0.433  | 2.859  |            |
|          | 0453          | 0.588   | 1.574  | 0.122   | 0.335  | 3.969  | >20    | 0.037  | 0.117  | B435          | 0.120   | 0.524  | 0.446   | 1.445  | 0.466  | 1.203  | 0.185  | 0.931  |            |
|          | 0460          | >20     | >20    | 0.114   | 0.417  | >20    | >20    | 0.023  | 0.119  | B438          | 1.619   | 4.339  | 3.089   | 9.200  | 3.289  | 8.819  | 3.571  | >20    |            |
|          | 0479          | 0.792   | 2.529  | 0.290   | 0.655  | 5.581  | 17.137 | 0.087  | 0.262  | B440          | 0.215   | 1.072  | 0.057   | 0.195  | 0.822  | 2.890  | 0.011  | 0.054  |            |
|          | 0495          | 0.482   | 1.678  | 0.024   | 0.064  | NT     | NT     | NT     | NT     | B441          | >20     | >20    | 0.128   | 0.445  | >20    | >20    | 0.166  | 0.898  |            |
|          | 0540          | 0.764   | 1.888  | 0.184   | 1.039  | 5.158  | 15.901 | 0.106  | 0.497  | B443          | 0.275   | 0.762  | 1.017   | >20    | NT     | NT     | NT     | NT     |            |
|          | 0551          | 0.316   | 0.685  | 2.246   | 4.900  | 1.670  | 3.791  | 16.193 | >20    | B445          | 6.206   | >20    | 0.496   | 1.559  | >20    | >20    | 0.164  | 0.753  |            |
|          | 0578          | >20     | >20    | 0.448   | 0.949  | 0.479  | 1.241  | 0.137  | 0.589  | B446          | 1.944   | 7.215  | 3.512   | 10.690 | 1.149  | 11.449 | 2.408  | 11.122 |            |
|          | 0579          | >20     | >20    | 1.118   | 16.215 | >20    | >20    | 0.057  | 0.474  | B449          | 18.929  | >20    | 0.046   | 0.101  | 3.487  | 19.057 | 0.033  | 0.169  |            |
|          | 0683          | 2.180   | 6.059  | >25     | >25    | NT     | NT     | NT     | NT     | B453          | 0.765   | 2.100  | 0.221   | 0.497  | 3.223  | 9.206  | 0.066  | 0.183  |            |
|          | B325          | 0.333   | 2.741  | >20     | >20    | NT     | NT     | NT     | NT     | B460          | 0.211   | 0.589  | >20     | >20    | 1.166  | 4.088  | >20    | >20    |            |
|          | B328          | 0.219   | 0.571  | 0.051   | 0.136  | NT     | NT     | NT     | NT     | B462          | 0.254   | 0.687  | 10.251  | >20    | 0.584  | 1.555  | >20    | >20    |            |
|          | B330          | 0.996   | 2.479  | 0.282   | 0.511  | NT     | NT     | NT     | NT     | B464          | 2.568   | 6.801  | >20     | >20    | 8.654  | >20    | >20    | >20    |            |

NT: Not tested.

Supplementary Table 2. HIV-1 RNA levels, CD4+ T cell counts and bNAb serum levels

| 9241                 | HIV-1 RNA | CD4+ T cells |    | 3BNC117  |          | 10-1074          |          |          |
|----------------------|-----------|--------------|----|----------|----------|------------------|----------|----------|
|                      |           |              |    | ELISA    | TZM-bl   | ELISA            | TZM-bl   |          |
|                      |           |              |    | Q769.d22 |          | X2088_c9 Du422.1 |          |          |
| Study Visit          | cp/ml     | cells/μl     | %  | μg/ml    |          | μg/ml            |          |          |
| Screen               | <20       | 702          | 39 | -        | -        | -                | -        | -        |
| Wk -2 (pre-infusion) | <20       | -            | -  | -        | -        | -                | -        | -        |
| d0 baseline          | <20       | 515          | 40 | <0.51    | <0.4     | <0.14            | <0.10    | -        |
| d0 end 3BNC117       | -         | -            | -  | 1,054.35 | 827.12   | <0.14            | <0.08    | -        |
| d0 end 10-1074       | -         | -            | -  | 897.99   | 1,223.04 | 1,581.00         | 2,618.17 | 1,138.65 |
| Wk 1                 | -         | -            | -  | -        | -        | -                | -        | -        |
| Wk 2                 | <20       | 550          | 39 | -        | -        | -                | -        | -        |
| Wk 3 baseline        | <20       | 728          | 43 | 58.67    | 58.46    | 405.17           | 267.98   | -        |
| Wk 3 end 3BNC117     | -         | -            | -  | 1,165.11 | 1,020.46 | 362.70           | 151.66   | -        |
| Wk 3 end 10-1074     | -         | -            | -  | 972.02   | 1,372.96 | 1,756.70         | 3,969.64 | 1,703.16 |
| Wk 4                 | <20       | -            | -  | -        | -        | -                | -        | -        |
| Wk 5                 | <20       | 714          | 38 | -        | -        | -                | -        | -        |
| Wk 6 baseline        | <20       | 632          | 42 | 82.55    | 144.92   | 509.51           | 293.39   | -        |
| Wk 6 end 3BNC117     | -         | -            | -  | 1,216.86 | 1,529.39 | 488.34           | 315.59   | -        |
| Wk 6 end 10-1074     | -         | -            | -  | 1,095.42 | 821.14   | 1,810.88         | 7,571.18 | 2,946.57 |
| Wk 7                 | <20       | -            | -  | -        | -        | -                | -        | -        |
| Wk 8                 | <20D      | 671          | 37 | -        | -        | -                | -        | -        |
| Wk 9                 | <20       | -            | -  | 109.83   | 138.90   | 754.72           | 416.89   | -        |
| Wk 10                | <20       | 713          | 40 | -        | -        | -                | -        | -        |
| Wk 11                | <20       | -            | -  | -        | -        | -                | -        | -        |
| Wk 12                | <20       | 709          | 37 | -        | -        | -                | -        | -        |
| Wk 13                | <20 D     | 564          | 40 | 30.33    | -        | 437.13           | -        | -        |
| Wk 14                | -         | -            | -  | -        | -        | -                | -        | -        |
| Wk 15                | <20       | 551          | 37 | 23.23    | 27.92    | 335.04           | 126.98   | -        |
| Wk 16                | <20 D     | 602          | 40 | -        | -        | -                | -        | -        |
| Wk 17                | <20       | 644          | 38 | -        | -        | -                | -        | -        |
| Wk 18                | <20 D     | 773          | 37 | 12.15    | 4.39     | 184.99           | 51.60    | -        |
| Wk 19                | <20       | -            | -  | -        | -        | -                | -        | -        |
| Wk 20                | 60        | 622          | 39 | 7.73     | 3.29     | 110.53           | 37.08    | -        |
| Wk 21                | 1,060     | 663          | 39 | 5.68     | 2.37     | 82.53            | 34.82    | -        |
| Wk 22                | 13,250    | 565          | 35 | 4.79     | 4.72     | 76.41            | 36.27    | -        |
| Wk 23                | -         | -            | -  | -        | -        | -                | -        | -        |
| Wk 24                | <20 D     | 766          | 40 | 2.58     | 1.63     | 58.34            | 19.22    | -        |
| Wk 25                | -         | -            | -  | -        | -        | -                | -        | -        |
| Wk 26                | <20 D     | -            | -  | -        | -        | -                | -        | -        |
| Wk 27                | -         | -            | -  | -        | -        | -                | -        | -        |
| Wk 28                | -         | -            | -  | -        | -        | -                | -        | -        |
| Wk 29                | -         | -            | -  | -        | -        | -                | -        | -        |
| Wk 30                | <20 D     | 695          | 41 | <0.78    | <0.46    | 19.55            | 4.12     | -        |

| 9242                 | HIV-1 RNA | CD4+ T cells |    | 3BNC117  |          | 10-1074          |          |          |
|----------------------|-----------|--------------|----|----------|----------|------------------|----------|----------|
|                      |           |              |    | ELISA    | TZM-bl   | ELISA            | TZM-bl   |          |
|                      |           |              |    | Q769.d22 |          | X2088_c9 Du422.1 |          |          |
| Study Visit          | cp/ml     | cells/μl     | %  | μg/ml    |          | μg/ml            |          |          |
| Screen               | <20       | 699          | 37 | -        | -        | -                | -        | -        |
| Wk -2 (pre-infusion) | <20       | -            | -  | -        | -        | -                | -        | -        |
| d0 baseline          | <20       | 654          | 34 | <0.51    | <0.24    | <0.14            | <0.08    | -        |
| d0 end 3BNC117       | -         | -            | -  | 880.88   | 1,182.36 | <0.14            | <0.08    | -        |
| d0 end 10-1074       | -         | -            | -  | 576.18   | 820.37   | 1,039.54         | 935.74   | 890.24   |
| Wk 1                 | <20       | -            | -  | 97.32    | -        | 413.44           | -        | -        |
| Wk 2                 | <20       | 626          | 30 | 40.41    | -        | 263.01           | -        | -        |
| Wk 3 baseline        | <20       | 752          | 34 | 19.80    | 48.71    | 164.23           | 103.41   | -        |
| Wk 3 end 3BNC117     | -         | -            | -  | 608.86   | 540.18   | 143.19           | 69.34    | -        |
| Wk 3 end 10-1074     | -         | -            | -  | 573.53   | 617.58   | 1,186.24         | 1,413.97 | 1,085.88 |
| Wk 4                 | <20       | -            | -  | 114.55   | -        | 749.80           | -        | -        |
| Wk 5                 | <20 D     | 583          | 31 | 65.25    | -        | 440.37           | -        | -        |
| Wk 6 baseline        | <20       | 621          | 37 | 43.88    | 73.42    | 332.14           | 197.30   | -        |
| Wk 6 end 3BNC117     | -         | -            | -  | 867.45   | 740.95   | 308.54           | 188.27   | -        |
| Wk 6 end 10-1074     | -         | -            | -  | 727.81   | 615.06   | 1,390.20         | 968.56   | 1,033.50 |
| Wk 7                 | <20       | -            | -  | 132.47   | -        | 588.80           | -        | -        |
| Wk 8                 | <20 D     | 729          | 35 | 85.87    | -        | 424.08           | -        | -        |
| Wk 9                 | <20       | -            | -  | 48.83    | 38.93    | 372.72           | 173.00   | -        |
| Wk 10                | <20       | 985          | 38 | -        | -        | -                | -        | -        |
| Wk 11                | <20       | -            | -  | -        | -        | -                | -        | -        |
| Wk 12                | <20       | 967          | 36 | 17.39    | 7.88     | 118.91           | 45.21    | -        |
| Wk 13                | <20 D     | 650          | 33 | -        | -        | -                | -        | -        |
| Wk 14                | 70        | 676          | 32 | 8.19     | 7.09     | 94.77            | 30.04    | -        |
| Wk 15                | 9,840     | 549          | 29 | 8.81     | 6.84     | 79.11            | 26.48    | -        |
| Wk 16                | 65,520    | 520          | 29 | 4.28     | 2.07     | 50.67            | 24.43    | -        |
| Wk 17                | -         | -            | -  | -        | -        | -                | -        | -        |
| Wk 18                | 440       | 620          | 31 | 4.60     | 1.89     | 44.62            | 10.12    | -        |
| Wk 19                | -         | -            | -  | -        | -        | -                | -        | -        |
| Wk 20                | 60        | 650          | 25 | 1.57     | 0.41     | 11.18            | 4.38     | -        |
| Wk 21                | -         | -            | -  | -        | -        | -                | -        | -        |
| Wk 22                | <20       | 614          | 32 | -        | -        | -                | -        | -        |
| Wk 23                | -         | -            | -  | -        | -        | -                | -        | -        |
| Wk 24                | <20 D     | 610          | 32 | <0.51    | <0.36    | 4.27             | 2.28     | -        |
| Wk 25                | -         | -            | -  | -        | -        | -                | -        | -        |
| Wk 26                | -         | -            | -  | -        | -        | -                | -        | -        |
| Wk 27                | -         | -            | -  | -        | -        | -                | -        | -        |
| Wk 28                | -         | -            | -  | -        | -        | -                | -        | -        |
| Wk 29                | -         | -            | -  | -        | -        | -                | -        | -        |
| Wk 30                | <20       | 546          | 34 | <0.51    | <0.26    | 1.02             | 0.40     | -        |

| 9243                 | HIV-1 RNA | CD4+ T cells |    | 3BNC117  |          | 10-1074          |          |          |
|----------------------|-----------|--------------|----|----------|----------|------------------|----------|----------|
|                      |           |              |    | ELISA    | TZM-bl   | ELISA            | TZM-bl   |          |
|                      |           |              |    | Q769.d22 |          | X2088_c9 Du422.1 |          |          |
| Study Visit          | cp/ml     | cells/μl     | %  | μg/ml    |          | μg/ml            |          |          |
| Screen               | <20       | 735          | 29 | -        | -        | -                | -        | -        |
| Wk -2 (pre-infusion) | <20 D     | -            | -  | -        | -        | -                | -        | -        |
| d0 baseline          | <20 D     | 583          | 32 | <0.78    | <0.24    | <0.14            | <0.08    | -        |
| d0 end 3BNC117       | -         | -            | -  | 802.08   | 1,179.19 | <0.14            | <0.08    | -        |
| d0 end 10-1074       | -         | -            | -  | 629.02   | 717.64   | 1,126.34         | 1,269.81 | 1,933.78 |
| Wk 1                 | <20       | -            | -  | 116.78   | -        | 518.11           | -        | -        |
| Wk 2                 | <20       | 423          | 25 | 90.58    | -        | 369.16           | -        | -        |
| Wk 3 baseline        | <20       | 475          | 30 | 57.81    | 33.19    | 257.69           | 141.99   | -        |
| Wk 3 end 3BNC117     | -         | -            | -  | 856.99   | 1,123.19 | 226.24           | 125.53   | -        |
| Wk 3 end 10-1074     | -         | -            | -  | 695.19   | 689.53   | 1,286.31         | 1,041.63 | 1,666.22 |
| Wk 4                 | <20       | -            | -  | 149.59   | -        | 744.32           | -        | -        |
| Wk 5                 | <20       | 438          | 27 | 112.90   | -        | 615.16           | -        | -        |
| Wk 6 baseline        | <20       | 557          | 29 | 84.41    | 92.07    | 439.77           | 213.90   | -        |
| Wk 6 end 3BNC117     | -         | -            | -  | 812.06   | 870.63   | 378.08           | 176.28   | -        |
| Wk 6 end 10-1074     | -         | -            | -  | 733.74   | 688.84   | 1,523.91         | 1,119.47 | 1,835.93 |
| Wk 7                 | <20       | -            | -  | 190.23   | -        | 956.76           | -        | -        |
| Wk 8                 | <20       | 708          | 24 | 101.70   | -        | 718.96           | -        | -        |
| Wk 9                 | <20       | -            | -  | 92.31    | 70.29    | 489.89           | 244.23   | -        |
| Wk 10                | <20       | 484          | 27 | -        | -        | -                | -        | -        |
| Wk 11                | <20 D     | -            | -  | -        | -        | -                | -        | -        |
| Wk 12                | <20       | 545          | 30 | 36.36    | 50.47    | 295.37           | 118.00   | -        |
| Wk 13                | <20       | 484          | 27 | -        | -        | -                | -        | -        |
| Wk 14                | <20       | 521          | 27 | -        | -        | -                | -        | -        |
| Wk 15                | <20       | 461          | 29 | 19.68    | 16.15    | 191.71           | 59.71    | -        |
| Wk 16                | <20 D     | 512          | 24 | -        | -        | -                | -        | -        |
| Wk 17                | <20       | 581          | 24 | -        | -        | -                | -        | -        |
| Wk 18                | <20       | 529          | 29 | 9.17     | 3.24     | 85.40            | 38.25    | -        |
| Wk 19                | <20 D     | 530          | 24 | 7.72     | 1.98     | 80.43            | 27.91    | -        |
| Wk 20                | 410       | 360          | 21 | 6.35     | 2.20     | 67.17            | 19.16    | -        |
| Wk 21                | 10,110    | 450          | 28 | 5.46     | 0.79     | 58.63            | 17.74    | -        |
| Wk 22                | -         | -            | -  | -        | -        | -                | -        | -        |
| Wk 23                | 83,430    | 450          | 25 | 4.21     | <0.36    | 31.27            | 18.19    | -        |
| Wk 24                | -         | -            | -  | -        | -        | -                | -        | -        |
| Wk 25                | 410       | 508          | 20 | -        | -        | -                | -        | -        |
| Wk 26                | -         | -            | -  | -        | -        | -                | -        | -        |
| Wk 27                | 540       | 600          | 26 | -        | -        | -                | -        | -        |
| Wk 28                | -         | -            | -  | -        | -        | -                | -        | -        |
| Wk 29                | -         | -            | -  | -        | -        | -                | -        | -        |
| Wk 30                | 40        | 466          | 29 | 1.60     | <0.26    | 10.54            | 1.48     | -        |

| 9244                 | HIV-1 RNA | CD4+ T cells |    | 3BNC117  |          | 10-1074          |          |          |
|----------------------|-----------|--------------|----|----------|----------|------------------|----------|----------|
|                      |           |              |    | ELISA    | TZM-bl   | ELISA            | TZM-bl   |          |
|                      |           |              |    | Q769.d22 |          | X2088_c9 Du422.1 |          |          |
| Study Visit          | cp/ml     | cells/μl     | %  | μg/ml    |          | μg/ml            |          |          |
| Screen               | <20       | 1,042        | 45 | -        | -        | -                | -        | -        |
| Wk -2 (pre-infusion) | <20       | -            | -  | -        | -        | -                | -        | -        |
| d0 baseline          | <20       | 1,110        | 43 | <0.51    | <0.24    | <0.14            | <0.08    | -        |
| d0 end 3BNC117       | -         | -            | -  | 815.01   | 746.19   | <0.14            | <0.08    | -        |
| d0 end 10-1074       | -         | -            | -  | 665.14   | 880.52   | 1,110.71         | 1,943.89 | 1,285.69 |
| Wk 1                 | <20       | -            | -  | 94.86    | -        | 420.18           | -        | -        |
| Wk 2                 | <20       | 890          | 45 | 44.55    | -        | 301.34           | -        | -        |
| Wk 3 baseline        | <20       | 794          | 44 | 49.96    | 117.85   | 239.56           | 156.12   | -        |
| Wk 3 end 3BNC117     | -         | -            | -  | 845.63   | 1,159.59 | 225.05           | 144.62   | -        |
| Wk 3 end 10-1074     | -         | -            | -  | 613.62   | 933.57   | 1,414.40         | 1,497.30 | 1,108.61 |
| Wk 4                 | <20       | -            | -  | 125.55   | -        | 647.28           | -        | -        |
| Wk 5                 | <20       | 1,100        | 44 | 64.47    | -        | 313.45           | -        | -        |
| Wk 6 baseline        | <20       | 632          | 42 | 22.48    | 57.13    | 272.66           | 211.41   | -        |
| Wk 6 end 3BNC117     | -         | -            | -  | 797.52   | 1,049.48 | 228.31           | 108.28   | -        |
| Wk 6 end 10-1074     | -         | -            | -  | 729.40   | 1,033.42 | 1,306.48         | 1,175.60 | 1,113.89 |
| Wk 7                 | <20       | -            | -  | 112.06   | -        | 593.18           | -        | -        |
| Wk 8                 | <20 D     | 1,251        | 37 | 89.28    | -        | 472.45           | -        | -        |
| Wk 9                 | <20       | -            | -  | 42.35    | 98.33    | 360.06           | 154.56   | -        |
| Wk 10                | <20 D     | 1,162        | 42 | -        | -        | -                | -        | -        |
| Wk 11                | <20       | -            | -  | -        | -        | -                | -        | -        |
| Wk 12                | <20       | 796          | 44 | 13.25    | 9.45     | 103.62           | 46.75    | -        |
| Wk 13                | <20       | 876          | 44 | -        | -        | -                | -        | -        |
| Wk 14                | <20 D     | 1,037        | 45 | 7.16     | 4.68     | 81.13            | 25.82    | -        |
| Wk 15                | <20       | 1,425        | 38 | -        | -        | -                | -        | -        |
| Wk 16                | <20       | 767          | 43 | -        | -        | -                | -        | -        |
| Wk 17                | <20 D     | 840          | 42 | -        | -        | -                | -        | -        |
| Wk 18                | <20       | 865          | 41 | 0.88     | <0.36    | 14.29            | 5.98     | -        |
| Wk 19                | <20       | 1,203        | 38 | <0.78    | <0.36    | 14.81            | 5.18     | -        |
| Wk 20                | 130       | 934          | 39 | <0.51    | <0.36    | 9.69             | 3.84     | -        |
| Wk 21                | 9,470     | 742          | 41 | <0.51    | <0.36    | 11.63            | 2.54     | -        |
| Wk 22                | 120,330   | 803          | 37 | -        | <0.46    | -                | 1.85     | -        |
| Wk 23                | -         | -            | -  | -        | -        | -                | -        | -        |
| Wk 24                | 160       | 970          | 44 | <0.51    | <0.36    | 4.26             | 1.82     | -        |
| Wk 25                | -         | -            | -  | -        | -        | -                | -        | -        |
|                      |           |              |    |          |          |                  |          |          |



Supplementary Table 2. HIV-1 RNA levels, CD4+ T cell counts and bNAb serum levels (continued)

| 9249                 | HIV-1 RNA | CD4+ T cells |    | 3BNC117  |          | 10-1074  |          |          |   |
|----------------------|-----------|--------------|----|----------|----------|----------|----------|----------|---|
|                      |           |              |    | ELISA    | TZM-bl   | ELISA    | TZM-bl   |          |   |
|                      |           |              |    | Q769.d22 | Q769.d22 | X2088_c9 | X2088_c9 | Du422.1  |   |
| Study Visit          | cp/ml     | cells/μl     | %  | μg/ml    |          | μg/ml    |          |          |   |
| Screen               | <20       | 1,070        | 41 | -        | -        | -        | -        | -        | - |
| Wk -2 (pre-infusion) | <20       | -            | -  | -        | -        | -        | -        | -        | - |
| d0 baseline          | 32        | 860          | 40 | <0.51    | <0.40    | <0.14    | <0.10    | -        | - |
| d0 end 3BNC117       | -         | -            | -  | 730.57   | 725.90   | <0.14    | <0.08    | -        | - |
| d0 end 10-1074       | -         | -            | -  | 517.93   | 305.30   | 1,089.60 | 777.07   | 1,005.36 | - |
| Wk 1                 | <20       | -            | -  | -        | -        | -        | -        | -        | - |
| Wk 2                 | 127       | 870          | 39 | -        | -        | -        | -        | -        | - |
| Wk 3 baseline        | 325       | 970          | 43 | 43.22    | 21.72    | 250.30   | 81.41    | -        | - |
| Wk 3 end 3BNC117     | -         | -            | -  | 769.67   | 903.00   | 273.37   | 152.89   | -        | - |
| Wk 3 end 10-1074     | -         | -            | -  | 727.14   | 546.94   | 1,221.15 | 6,336.80 | 1,174.28 | - |
| Wk 4                 | 60,000    | -            | -  | 101.02   | 61.66    | 631.81   | 316.39   | -        | - |
| Wk 5                 | -         | -            | -  | -        | -        | -        | -        | -        | - |
| Wk 6                 | 4,560     | 630          | 39 | 79.31    | 82.00    | 603.73   | 162.28   | -        | - |
| Wk 7                 | -         | -            | -  | -        | -        | -        | -        | -        | - |
| Wk 8                 | 5,150     | 810          | 36 | -        | -        | -        | -        | -        | - |
| Wk 9                 | -         | -            | -  | -        | -        | -        | -        | -        | - |
| Wk 10                | 1,590     | 750          | 41 | 15.82    | 8.69     | 193.88   | 65.91    | -        | - |
| Wk 11                | -         | -            | -  | -        | -        | -        | -        | -        | - |
| Wk 12                | 1,120     | 630          | 42 | 7.23     | 5.82     | 99.32    | 50.47    | -        | - |
| Wk 13                | -         | -            | -  | -        | -        | -        | -        | -        | - |
| Wk 14                | 539       | 840          | 43 | 3.77     | 2.51     | 70.11    | 31.30    | -        | - |
| Wk 15                | -         | -            | -  | -        | -        | -        | -        | -        | - |
| Wk 16                | 323       | 610          | 41 | -        | -        | -        | -        | -        | - |
| Wk 17                | -         | -            | -  | -        | -        | -        | -        | -        | - |
| Wk 18                | 230       | 750          | 36 | -        | <0.28    | -        | 5.72     | -        | - |
| Wk 19                | -         | -            | -  | -        | -        | -        | -        | -        | - |
| Wk 20                | 102       | 530          | 36 | -        | -        | -        | -        | -        | - |
| Wk 21                | -         | -            | -  | -        | -        | -        | -        | -        | - |
| Wk 22                | 53        | 650          | 45 | -        | <0.28    | -        | 2.33     | -        | - |
| Wk 23                | -         | -            | -  | -        | -        | -        | -        | -        | - |
| Wk 24                | <20 D     | 770          | 35 | <0.51    | <0.28    | 6.24     | 0.88     | -        | - |
| Wk 25                | -         | -            | -  | -        | -        | -        | -        | -        | - |
| Wk 26                | <20 D     | 900          | 42 | -        | -        | -        | -        | -        | - |
| Wk 27                | -         | -            | -  | -        | -        | -        | -        | -        | - |
| Wk 28                | <20 D     | 880          | 40 | -        | -        | -        | -        | -        | - |
| Wk 29                | -         | -            | -  | -        | -        | -        | -        | -        | - |
| Wk 30                | 21        | 620          | 40 | <0.51    | <0.26    | 1.31     | 0.36     | -        | - |

| 9250                 | HIV-1 RNA | CD4+ T cells |    | 3BNC117  |          | 10-1074  |          |          |   |
|----------------------|-----------|--------------|----|----------|----------|----------|----------|----------|---|
|                      |           |              |    | ELISA    | TZM-bl   | ELISA    | TZM-bl   |          |   |
|                      |           |              |    | Q769.d22 | Q769.d22 | X2088_c9 | X2088_c9 | Du422.1  |   |
| Study Visit          | cp/ml     | cells/μl     | %  | μg/ml    |          | μg/ml    |          |          |   |
| Screen               | <20       | 673          | 37 | -        | -        | -        | -        | -        | - |
| Wk -2 (pre-infusion) | 40        | -            | -  | -        | -        | -        | -        | -        | - |
| d0 baseline          | 50        | 550          | 39 | <0.51    | <0.40    | <0.14    | <0.10    | -        | - |
| d0 end 3BNC117       | -         | -            | -  | 974.23   | 1,119.01 | <0.14    | <0.08    | -        | - |
| d0 end 10-1074       | -         | -            | -  | 835.05   | 743.38   | 1,392.93 | 2,183.68 | 1,077.19 | - |
| Wk 1                 | <20       | -            | -  | -        | -        | -        | -        | -        | - |
| Wk 2                 | <20 D     | 589          | 33 | -        | -        | -        | -        | -        | - |
| Wk 3 baseline        | 20        | 679          | 38 | 82.09    | 62.90    | 466.94   | 344.97   | -        | - |
| Wk 3 end 3BNC117     | -         | -            | -  | 1,025.92 | 1,058.27 | 377.75   | 200.03   | -        | - |
| Wk 3 end 10-1074     | -         | -            | -  | 878.02   | 948.24   | 1,776.33 | 3,908.63 | 1,425.91 | - |
| Wk 4                 | 50        | -            | -  | -        | -        | -        | -        | -        | - |
| Wk 5                 | 90        | 637          | 35 | -        | -        | -        | -        | -        | - |
| Wk 6 baseline        | 3,700     | 614          | 36 | 117.71   | 98.42    | 631.50   | 440.44   | -        | - |
| Wk 6 end 3BNC117     | -         | -            | -  | 1,039.73 | 908.95   | 632.20   | 308.25   | -        | - |
| Wk 6 end 10-1074     | -         | -            | -  | 855.83   | 747.98   | 1,993.71 | 1,245.37 | 1,441.19 | - |
| Wk 7                 | 2,070     | -            | -  | 225.00   | 206.56   | 1,206.47 | 1,672.09 | 792.20   | - |
| Wk 8                 | 23,610    | 593          | 31 | 165.44   | 162.22   | 899.45   | 1,287.42 | 402.08   | - |
| Wk 9                 | -         | -            | -  | -        | -        | -        | -        | -        | - |
| Wk 10                | 490       | 636          | 30 | 129.95   | -        | 662.70   | -        | -        | - |
| Wk 11                | -         | -            | -  | -        | -        | -        | -        | -        | - |
| Wk 12                | <20       | 567          | 32 | 61.79    | 97.88    | 454.75   | 701.58   | 270.90   | - |
| Wk 13                | -         | -            | -  | -        | -        | -        | -        | -        | - |
| Wk 14                | <20 D     | 542          | 36 | 39.42    | -        | 384.37   | -        | -        | - |
| Wk 15                | -         | -            | -  | -        | -        | -        | -        | -        | - |
| Wk 16                | <20 D     | 596          | 30 | 39.96    | 28.24    | 370.49   | 180.61   | -        | - |
| Wk 17                | -         | -            | -  | -        | -        | -        | -        | -        | - |
| Wk 18                | -         | -            | -  | -        | -        | -        | -        | -        | - |
| Wk 19                | -         | -            | -  | -        | -        | -        | -        | -        | - |
| Wk 20                | 20        | 703          | 37 | 17.80    | 8.76     | 194.42   | 88.13    | -        | - |
| Wk 21                | -         | -            | -  | -        | -        | -        | -        | -        | - |
| Wk 22                | -         | -            | -  | -        | -        | -        | -        | -        | - |
| Wk 23                | -         | -            | -  | -        | -        | -        | -        | -        | - |
| Wk 24                | 30        | 744          | 34 | 12.94    | 6.90     | 110.40   | 59.37    | -        | - |
| Wk 25                | -         | -            | -  | -        | -        | -        | -        | -        | - |
| Wk 26                | -         | -            | -  | -        | -        | -        | -        | -        | - |
| Wk 27                | -         | -            | -  | -        | -        | -        | -        | -        | - |
| Wk 28                | -         | -            | -  | -        | -        | -        | -        | -        | - |
| Wk 29                | -         | -            | -  | -        | -        | -        | -        | -        | - |
| Wk 30                | 40        | 733          | 35 | 4.52     | 2.21     | 69.22    | 17.78    | -        | - |

| 9251                 | HIV-1 RNA | CD4+ T cells |    | 3BNC117  |          | 10-1074  |          |          |   |
|----------------------|-----------|--------------|----|----------|----------|----------|----------|----------|---|
|                      |           |              |    | ELISA    | TZM-bl   | ELISA    | TZM-bl   |          |   |
|                      |           |              |    | Q769.d22 | Q769.d22 | X2088_c9 | X2088_c9 | Du422.1  |   |
| Study Visit          | cp/ml     | cells/μl     | %  | μg/ml    |          | μg/ml    |          |          |   |
| Screen               | <20       | 661          | 39 | -        | -        | -        | -        | -        | - |
| Wk -2 (pre-infusion) | <20       | -            | -  | -        | -        | -        | -        | -        | - |
| d0 baseline          | <20       | 672          | 40 | <0.51    | <0.40    | 1.69     | <0.10    | -        | - |
| d0 end 3BNC117       | -         | -            | -  | 715.25   | 1,068.97 | n.a.     | <0.10    | -        | - |
| d0 end 10-1074       | -         | -            | -  | 653.97   | 499.50   | 1,219.30 | 1,819.97 | 907.76   | - |
| Wk 1                 | <20       | -            | -  | -        | 111.48   | -        | 335.17   | -        | - |
| Wk 2                 | <20       | 713          | 38 | -        | 54.17    | -        | 228.95   | -        | - |
| Wk 3 baseline        | <20       | 760          | 40 | 34.14    | 6.40     | 182.45   | 120.01   | -        | - |
| Wk 3 end 3BNC117     | -         | -            | -  | 667.03   | 1,485.62 | 179.09   | 134.72   | -        | - |
| Wk 3 end 10-1074     | -         | -            | -  | 676.18   | 602.34   | 1,527.88 | 3,037.93 | 1,319.69 | - |
| Wk 4                 | <20       | -            | -  | -        | 125.28   | -        | 374.15   | -        | - |
| Wk 5                 | <20       | -            | -  | -        | -        | -        | -        | -        | - |
| Wk 6 baseline        | 200       | 614          | 41 | 33.34    | 9.18     | 279.29   | 140.94   | -        | - |
| Wk 6 end 3BNC117     | -         | -            | -  | 957.09   | 1,678.63 | 187.82   | 165.07   | -        | - |
| Wk 6 end 10-1074     | -         | -            | -  | 736.64   | 603.24   | 1,195.80 | 2,967.02 | 1,374.08 | - |
| Wk 7                 | 1,810     | -            | -  | 123.94   | 54.63    | 886.67   | 387.05   | -        | - |
| Wk 8                 | 6,390     | 560          | 37 | 55.28    | 18.36    | 579.27   | 155.96   | -        | - |
| Wk 9                 | -         | -            | -  | -        | -        | -        | -        | -        | - |
| Wk 10                | 150       | 763          | 31 | 43.27    | -        | 396.14   | -        | -        | - |
| Wk 11                | -         | -            | -  | -        | -        | -        | -        | -        | - |
| Wk 12                | 40        | 679          | 30 | 18.17    | 8.92     | 228.39   | 52.80    | -        | - |
| Wk 13                | -         | -            | -  | -        | -        | -        | -        | -        | - |
| Wk 14                | 170       | 740          | 44 | 7.91     | -        | 170.16   | -        | -        | - |
| Wk 15                | -         | -            | -  | -        | -        | -        | -        | -        | - |
| Wk 16                | 130       | 382          | 27 | -        | 1.08     | -        | 26.04    | -        | - |
| Wk 17                | -         | -            | -  | -        | -        | -        | -        | -        | - |
| Wk 18                | 16,070    | 748          | 37 | 1.15     | <0.46    | 35.90    | 11.14    | -        | - |
| Wk 19                | -         | 719          | 33 | -        | -        | -        | -        | -        | - |
| Wk 20                | 370       | 1,044        | 36 | <0.78    | <0.46    | 24.09    | 5.70     | -        | - |
| Wk 21                | -         | -            | -  | -        | -        | -        | -        | -        | - |
| Wk 22                | 280       | 664          | 30 | -        | -        | -        | -        | -        | - |
| Wk 23                | -         | -            | -  | -        | -        | -        | -        | -        | - |
| Wk 24                | 40        | 827          | 38 | -        | <0.46    | -        | 2.13     | -        | - |
| Wk 25                | -         | -            | -  | -        | -        | -        | -        | -        | - |
| Wk 26                | 30        | 1,010        | 44 | -        | -        | -        | -        | -        | - |
| Wk 27                | -         | -            | -  | -        | -        | -        | -        | -        | - |
| Wk 28                | <20 D     | 1,112        | 34 | -        | -        | -        | -        | -        | - |
| Wk 29                | -         | -            | -  | -        | -        | -        | -        | -        | - |
| Wk 30                | <20       | 860          | 34 | <0.51    | <0.28    | n.a.     | 0.10     | -        | - |

| 9252                 | HIV-1 RNA | CD4+ T cells |    | 3BNC117  |          | 10-1074  |          |          |   |
|----------------------|-----------|--------------|----|----------|----------|----------|----------|----------|---|
|                      |           |              |    | ELISA    | TZM-bl   | ELISA    | TZM-bl   |          |   |
|                      |           |              |    | Q769.d22 | Q769.d22 | X2088_c9 | X2088_c9 | Du422.1  |   |
| Study Visit          | cp/ml     | cells/μl     | %  | μg/ml    |          | μg/ml    |          |          |   |
| Screen               | <20       | 655          | 39 | -        | -        | -        | -        | -        | - |
| Wk -2 (pre-infusion) | <20       | -            | -  | -        | -        | -        | -        | -        | - |
| d0 baseline          | <20       | 598          | 35 | <0.51    | <0.40    | <0.14    | <0.10    | -        | - |
| d0 end 3BNC117       | -         | -            | -  | 1,088.44 | 1,390.73 | <0.14    | <0.08    | -        | - |
| d0 end 10-1074       | -         | -            | -  | 989.26   | 802.28   | 1,823.06 | 5,441.90 | 1,006.23 | - |
| Wk 1                 | <20 D     | -            | -  | -        | -        | -        | -        | -        | - |
| Wk 2                 | <20       | 655          | 36 | -        | -        | -        | -        | -        | - |
| Wk 3 baseline        | <20       | 745          | 32 | 50.38    | 36.98    | 331.73   | 313.42   | -        | - |
| Wk 3 end 3BNC117     | -         | -            | -  | 1,073.19 | 1,150.10 | 236.82   | 144.59   | -        | - |
| Wk 3 end 10-1074     | -         | -            | -  | 981.49   | 787.70   | 1,801.51 | 7,718.30 | 1,890.48 | - |
| Wk 4                 | <20       | -            | -  | -        | -        | -        | -        | -        | - |
| Wk 5                 | <20       | 626          | 37 | -        | -        | -        | -        | -        | - |
| Wk 6 baseline        | <20       | 632          | 37 | 89.51    | 84.88    | 821.32   | 265.76   | -        | - |
| Wk 6 end 3BNC117     | -         | -            | -  | 1,204.82 | 1,081.40 | 807.39   | 305.15   | -        | - |
| Wk 6 end 10-1074     | -         | -            | -  | 1,174.40 | 1,091.66 | 3,441.41 | 6,093.51 | 1,487.96 | - |
| Wk 7                 | <20       | -            | -  | -        | -        | -        | -        | -        | - |
| Wk 8                 | <20       | 634          | 37 | -        | -        | -        | -        | -        | - |
| Wk 9                 | <20       | -            | -  | 91.24    | 70.38    | 714.24   | 447.90   | -        | - |
| Wk 10                | <20       | 701          | 37 | -        | -        | -        | -        | -        | - |
| Wk 11                | <20       | -            | -  | -        | -        | -        | -        | -        | - |
| Wk 12                | <20       | 748          | 37 | 28.74    | 20.22    | 265.54   | 105.83   | -        | - |
| Wk 13                | <20       | 703          | 37 | -        | -        | -        | -        | -        | - |
| Wk 14                | <20       | 886          | 33 | -        | -        | -        | -        | -        | - |
| Wk 15                | <20       | 654          | 33 | 12.61    | 7.25     | 191.93   | 53.31    | -        | - |
| Wk 16                | <20       | 640          | 34 | -        | -        | -        | -        | -        | - |
| Wk 17                | <20       | 650          | 34 | -        | -        | -        | -        | -        | - |
| Wk 18                | <20       | 768          | 32 | 5.12     | 3.50     | 62.09    | 30.45    | -        | - |
| Wk 19                | <20       | 719          | 33 | -        | -        | -        | -        | -        | - |
| Wk 20                | <20       | 680          | 36 | 4.53     | 0.99     | 43.57    | 13.92    | -        | - |
| Wk 21                | -         | -            | -  | -        | -        | -        | -        | -        | - |
| Wk 22                | 1,890     | 428          | 36 | 1.01     | 0.       |          |          |          |   |

Supplementary Table 2. HIV-1 RNA levels, CD4+ T cell counts and bNAb serum levels (continued)

| 9253                 | HIV-1 RNA | CD4+ T cells |    | 3BNC117  |          | 10-1074  |          |          |
|----------------------|-----------|--------------|----|----------|----------|----------|----------|----------|
|                      |           |              |    | ELISA    | TZM-bi   | ELISA    | TZM-bi   |          |
|                      |           |              |    | Q769.d22 | Q769.d22 | X2088_c9 | Du422.1  |          |
| Study Visit          | cp/ml     | cells/μl     | %  | μg/ml    |          | μg/ml    |          |          |
| Screen               | <20       | 990          | 36 | -        | -        | -        | -        | -        |
| Wk -2 (pre-infusion) | 41        | -            | -  | -        | -        | -        | -        | -        |
| d0 baseline          | <20 D     | 950          | 36 | <0.51    | <0.46    | <0.14    | <0.10    | -        |
| d0 end 3BNC117       | -         | -            | -  | 977.53   | 1,019.91 | <0.14    | <0.08    | -        |
| d0 end 10-1074       | -         | -            | -  | 822.18   | 1,118.61 | 3,101.34 | 1,614.08 | 1,022.43 |
| Wk 1                 | <20       | -            | -  | -        | -        | -        | -        | -        |
| Wk 2                 | <20       | 910          | 37 | -        | -        | -        | -        | -        |
| Wk 3 baseline        | 63        | 770          | 34 | 61.42    | 35.19    | 387.61   | 164.75   | -        |
| Wk 3 end 3BNC117     | -         | -            | -  | 858.41   | 826.74   | 373.51   | 110.90   | -        |
| Wk 3 end 10-1074     | -         | -            | -  | 786.52   | 1,505.67 | 2,530.64 | 2,642.70 | 1,118.03 |
| Wk 4                 | 66        | -            | -  | 101.72   | 303.23   | 1,094.85 | 611.07   | 401.56   |
| Wk 5                 | 10,200    | 720          | 37 | 75.71    | 105.48   | 764.14   | 425.17   | -        |
| Wk 6                 | 24,300    | -            | -  | 59.35    | 44.78    | 670.83   | 214.53   | -        |
| Wk 7                 | -         | -            | -  | -        | -        | -        | -        | -        |
| Wk 8                 | 118       | 890          | 36 | 38.34    | -        | 252.91   | -        | -        |
| Wk 9                 | -         | -            | -  | -        | -        | -        | -        | -        |
| Wk 10                | <20 D     | 1,000        | 36 | -        | -        | -        | -        | -        |
| Wk 11                | -         | -            | -  | -        | -        | -        | -        | -        |
| Wk 12                | <20 D     | 960          | 35 | 6.09     | 5.38     | 98.41    | 21.65    | -        |
| Wk 13                | -         | -            | -  | -        | -        | -        | -        | -        |
| Wk 14                | <20       | 790          | 40 | 4.02     | 1.75     | 52.43    | 14.76    | -        |
| Wk 15                | -         | -            | -  | -        | -        | -        | -        | -        |
| Wk 16                | <20       | 780          | 35 | 1.88     | <0.26    | 32.85    | 5.46     | -        |
| Wk 17                | -         | -            | -  | -        | -        | -        | -        | -        |
| Wk 18                | -         | -            | -  | -        | -        | -        | -        | -        |
| Wk 19                | -         | -            | -  | -        | -        | -        | -        | -        |
| Wk 20                | -         | -            | -  | -        | -        | -        | -        | -        |
| Wk 21                | -         | -            | -  | -        | -        | -        | -        | -        |
| Wk 22                | -         | -            | -  | -        | -        | -        | -        | -        |
| Wk 23                | -         | -            | -  | -        | -        | -        | -        | -        |
| Wk 24                | <20 D     | 770          | 35 | <0.51    | <0.26    | 4.20     | 0.84     | -        |
| Wk 25                | -         | -            | -  | -        | -        | -        | -        | -        |
| Wk 26                | -         | -            | -  | -        | -        | -        | -        | -        |
| Wk 27                | -         | -            | -  | -        | -        | -        | -        | -        |
| Wk 28                | -         | -            | -  | -        | -        | -        | -        | -        |
| Wk 29                | -         | -            | -  | -        | -        | -        | -        | -        |
| Wk 30                | <20       | 840          | 35 | <0.51    | <0.26    | 1.18     | 0.26     | -        |

| 9254                 | HIV-1 RNA | CD4+ T cells |    | 3BNC117  |          | 10-1074  |          |        |
|----------------------|-----------|--------------|----|----------|----------|----------|----------|--------|
|                      |           |              |    | ELISA    | TZM-bi   | ELISA    | TZM-bi   |        |
|                      |           |              |    | Q769.d22 | Q769.d22 | X2088_c9 | Du422.1  |        |
| Study Visit          | cp/ml     | cells/μl     | %  | μg/ml    |          | μg/ml    |          |        |
| Screen               | <20       | 750          | 37 | -        | -        | -        | -        | -      |
| Wk -2 (pre-infusion) | <20       | -            | -  | -        | -        | -        | -        | -      |
| d0 baseline          | <20       | 860          | 40 | <0.51    | <0.46    | <0.14    | <0.10    | -      |
| d0 end 3BNC117       | -         | -            | -  | 718.34   | 723.03   | <0.14    | <0.08    | -      |
| d0 end 10-1074       | -         | -            | -  | 699.73   | 1,116.14 | 2,561.83 | 1,659.71 | 827.32 |
| Wk 1                 | <20       | -            | -  | -        | -        | -        | -        | -      |
| Wk 2                 | <20       | 980          | 39 | -        | -        | -        | -        | -      |
| Wk 3 baseline        | <20       | 990          | 37 | 48.60    | 56.99    | 329.25   | 179.01   | -      |
| Wk 3 end 3BNC117     | -         | -            | -  | 776.95   | 1,275.08 | 366.20   | 110.49   | -      |
| Wk 3 end 10-1074     | -         | -            | -  | 723.93   | 1,608.25 | 3,052.30 | 1,718.51 | 909.49 |
| Wk 4                 | <20       | 1,010        | 39 | -        | -        | -        | -        | -      |
| Wk 5                 | <20       | 930          | 39 | -        | -        | -        | -        | -      |
| Wk 6 baseline        | <20       | 880          | 40 | 67.53    | 46.58    | 555.77   | 234.68   | -      |
| Wk 6 end 3BNC117     | -         | -            | -  | 1,420.89 | 1,005.13 | 421.41   | 257.98   | -      |
| Wk 6 end 10-1074     | -         | -            | -  | 1,416.54 | 729.62   | 2,493.10 | 2,040.62 | -      |
| Wk 7                 | <20       | -            | -  | -        | -        | -        | -        | -      |
| Wk 8                 | <20       | 1,240        | 40 | -        | -        | -        | -        | -      |
| Wk 9                 | <20       | -            | -  | 83.70    | 95.49    | 674.51   | 227.21   | -      |
| Wk 10                | <20       | 1,030        | 41 | -        | -        | -        | -        | -      |
| Wk 11                | <20       | -            | -  | -        | -        | -        | -        | -      |
| Wk 12                | <20       | 940          | 40 | 23.42    | 17.09    | 210.17   | 83.16    | -      |
| Wk 13                | <20       | 910          | 39 | -        | -        | -        | -        | -      |
| Wk 14                | <20       | 940          | 40 | -        | -        | -        | -        | -      |
| Wk 15                | <20       | 940          | 37 | 10.80    | 3.78     | 170.91   | 64.50    | -      |
| Wk 16                | <20       | 950          | 39 | -        | -        | -        | -        | -      |
| Wk 17                | <20       | 880          | 38 | -        | -        | -        | -        | -      |
| Wk 18                | <20       | 880          | 36 | 6.28     | 1.04     | 90.38    | 26.62    | -      |
| Wk 19                | <20       | 960          | 38 | -        | -        | -        | -        | -      |
| Wk 20                | <20       | 700          | 35 | -        | -        | -        | -        | -      |
| Wk 21                | <20       | 740          | 38 | 0.87     | <0.26    | 46.30    | 12.83    | -      |
| Wk 22                | <20       | 830          | 39 | -        | -        | -        | -        | -      |
| Wk 23                | <20       | 820          | 38 | -        | -        | -        | -        | -      |
| Wk 24                | <20       | 980          | 39 | <0.51    | <0.26    | 28.70    | 9.38     | -      |
| Wk 25                | <20       | 1,080        | 38 | -        | -        | -        | -        | -      |
| Wk 26                | <20       | 940          | 39 | -        | -        | -        | -        | -      |
| Wk 27                | <20       | 920          | 39 | -        | <0.30    | -        | 5.75     | -      |
| Wk 28                | -         | -            | -  | -        | -        | -        | -        | -      |
| Wk 29**              | <40       | -            | -  | -        | -        | -        | -        | -      |
| Wk 31**              | <20       | -            | -  | -        | -        | -        | -        | -      |

| 9255                 | HIV-1 RNA | CD4+ T cells |    | 3BNC117  |          | 10-1074  |          |          |
|----------------------|-----------|--------------|----|----------|----------|----------|----------|----------|
|                      |           |              |    | ELISA    | TZM-bi   | ELISA    | TZM-bi   |          |
|                      |           |              |    | Q769.d22 | Q769.d22 | X2088_c9 | Du422.1  |          |
| Study Visit          | cp/ml     | cells/μl     | %  | μg/ml    |          | μg/ml    |          |          |
| Screen               | <20       | 1,500        | 50 | -        | -        | -        | -        | -        |
| Wk -2 (pre-infusion) | <20 D     | -            | -  | -        | -        | -        | -        | -        |
| d0 baseline          | <20       | 1,360        | 51 | <0.51    | <0.46    | <0.14    | <0.10    | -        |
| d0 end 3BNC117       | -         | -            | -  | 737.15   | 1,016.37 | <0.14    | <0.08    | -        |
| d0 end 10-1074       | -         | -            | -  | 592.97   | 1,176.34 | 1,627.91 | 1,008.19 | 785.47   |
| Wk 1                 | <20 D     | 1,420        | 52 | -        | -        | -        | -        | -        |
| Wk 2                 | <20       | 1,160        | 52 | -        | -        | -        | -        | -        |
| Wk 3 baseline        | <20 D     | 1,460        | 51 | 40.44    | 59.85    | 390.94   | 166.15   | -        |
| Wk 3 end 3BNC117     | -         | -            | -  | 653.65   | 591.22   | 378.73   | 172.97   | -        |
| Wk 3 end 10-1074     | -         | -            | -  | 482.53   | 636.04   | 1,397.83 | 1,375.81 | 1,178.40 |
| Wk 4                 | <20 D     | -            | -  | -        | -        | -        | -        | -        |
| Wk 5                 | <20       | 1,640        | 50 | -        | -        | -        | -        | -        |
| Wk 6 baseline        | <20       | 1,570        | 50 | 74.99    | 33.40    | 509.23   | 237.12   | -        |
| Wk 6 end 3BNC117     | -         | -            | -  | 1,146.24 | 666.34   | 541.54   | 177.31   | -        |
| Wk 6 end 10-1074     | -         | -            | -  | 985.63   | 570.96   | 2,039.18 | 1,534.39 | -        |
| Wk 7                 | <20 D     | -            | -  | -        | -        | -        | -        | -        |
| Wk 8                 | <20       | 1,110        | 51 | -        | -        | -        | -        | -        |
| Wk 9                 | <20       | -            | -  | 66.40    | 30.02    | 658.27   | 273.87   | -        |
| Wk 10                | <20 D     | 1,450        | 49 | -        | -        | -        | -        | -        |
| Wk 11                | <20       | -            | -  | -        | -        | -        | -        | -        |
| Wk 12                | <20       | 1,350        | 48 | 56.40    | 33.65    | 234.01   | 106.58   | -        |
| Wk 13                | <20       | 1,470        | 49 | -        | -        | -        | -        | -        |
| Wk 14                | <20       | 1,440        | 49 | 26.52    | 9.94     | 136.85   | 55.58    | -        |
| Wk 15                | 207       | 1,330        | 46 | -        | -        | -        | -        | -        |
| Wk 16                | <20       | 1,340        | 48 | -        | -        | -        | -        | -        |
| Wk 17                | <20 D     | 1,470        | 49 | -        | -        | -        | -        | -        |
| Wk 18                | 60        | 1,110        | 52 | 6.09     | 2.42     | 91.64    | 29.56    | -        |
| Wk 19                | <20 D     | 1,420        | 50 | -        | -        | -        | -        | -        |
| Wk 20                | <20       | 1,710        | 50 | -        | -        | -        | -        | -        |
| Wk 21                | 55        | 1,320        | 50 | 5.01     | 0.62     | 68.20    | 15.82    | -        |
| Wk 22                | 42        | 1,690        | 50 | -        | -        | -        | -        | -        |
| Wk 23                | <20       | 1,430        | 49 | -        | -        | -        | -        | -        |
| Wk 24                | <20       | 1,320        | 45 | 1.17     | <0.26    | 35.70    | 7.90     | -        |
| Wk 25                | <20 D     | 1,550        | 50 | -        | -        | -        | -        | -        |
| Wk 26                | <20 D     | 1,680        | 50 | -        | -        | -        | -        | -        |
| Wk 27                | 29        | -            | -  | -        | -        | -        | -        | -        |
| Wk 28                | <20       | 1,280        | 50 | -        | -        | -        | -        | -        |
| Wk 29                | <20       | 1,260        | 51 | -        | -        | -        | -        | -        |
| Wk 30                | <20       | 1,400        | 49 | <0.51    | <0.26    | 10.00    | 2.73     | -        |
| Wk 32***             | <20       | -            | -  | -        | -        | -        | -        | -        |
| Wk 34***             | <20       | -            | -  | -        | -        | -        | -        | -        |

\* Determined using ID<sub>80</sub> and IC<sub>80</sub>.

\*\* Participant 9254 relocated following the week 27 study visit and chose to remain off ART beyond week 30. HIV-1 RNA continued to be monitored every two weeks from samples drawn at an external practice and it remained undetectable.

\*\*\* Participant 9255 chose to remain off ART beyond week 30.

Grey shaded area indicates time on antiretroviral therapy.

Yellow shaded area indicates time of viral rebound.

Green numbers indicate detectable background by ELISA. If detected, background was subtracted from subsequent results. Results within a 3-fold of the background levels were not included (n.a.).

<20 D: Plasma HIV-1 RNA detected but not quantifiable by clinical assay.

Supplementary Table 3. Adverse events reported during 30 weeks of study follow-up

| Adverse Event (AE)                      | AEs<br>(no.) | Severity Grade |                   |                 | Participants of n=15<br>(no.) |
|-----------------------------------------|--------------|----------------|-------------------|-----------------|-------------------------------|
|                                         |              | Mild<br>(no.)  | Moderate<br>(no.) | Severe<br>(no.) |                               |
| <b>Related to 3BNC117 + 10-1074</b>     |              |                |                   |                 |                               |
| Malaise/Fatigue                         | 2            | 2              | 0                 | 0               | 2                             |
| <b>Total related</b>                    | <b>2</b>     | <b>2</b>       | <b>0</b>          | <b>0</b>        | <b>2</b>                      |
| <b>Not related to 3BNC117 + 10-1074</b> |              |                |                   |                 |                               |
| Upper respiratory tract infection       | 12           | 6              | 6                 | 0               | 6                             |
| Myalgia                                 | 3            | 3              | 0                 | 0               | 2                             |
| Transient increase in direct bilirubin* | 2            | n/a            | n/a               | 2               | 2                             |
| Albuminuria                             | 1            | 1              | 0                 | 0               | 1                             |
| Back pain                               | 1            | 1              | 0                 | 0               | 1                             |
| Bloating                                | 1            | 1              | 0                 | 0               | 1                             |
| Conjunctivitis                          | 1            | 0              | 1                 | 0               | 1                             |
| Malaise/Fatigue                         | 1            | 1              | 0                 | 0               | 1                             |
| Flu-like symptoms                       | 1            | 1              | 0                 | 0               | 1                             |
| Hordeolum                               | 1            | 0              | 0                 | 1               | 1                             |
| Nausea                                  | 1            | 1              | 0                 | 0               | 1                             |
| Otitis media                            | 1            | 0              | 1                 | 0               | 1                             |
| Rash**                                  | 1            | 1              | 0                 | 0               | 1                             |
| Transient increase in AST               | 1            | 1              | 0                 | 0               | 1                             |
| Vomiting                                | 1            | 1              | 0                 | 0               | 1                             |
| Worsening in hypertension               | 1            | 0              | 0                 | 1               | 1                             |
| <b>Total Not related</b>                | <b>30</b>    | <b>18</b>      | <b>8</b>          | <b>4</b>        | <b>12</b>                     |
| <b>Total</b>                            | <b>32</b>    | <b>20</b>      | <b>8</b>          | <b>4</b>        | <b>13</b>                     |

\* Transient elevation to 0.7 mg/dL and intermittent elevations to 0.3 mg/dL were graded as severe following the DAIDS Toxicity Table (v. 2.0).

\*\* Mild maculopapular rash that occurred at the time of viral rebound and was compatible with acute retroviral syndrome but not accompanied by systemic symptoms and resolved within two weeks of initiation of ART.

**Supplementary Table 4. Virus neutralization by 3BNC117 and 10-1074**

| Participant    | Source            | Method            | Time Point   | Virus ID    | 3BNC117 |        | 10-1074 |       |
|----------------|-------------------|-------------------|--------------|-------------|---------|--------|---------|-------|
|                |                   |                   |              |             | IC50    | IC80   | IC50    | IC80  |
| 9242           | Reservoir         | Q2VOA             | Week -2      | 9242_A8     | 0.475   | 1.360  | 0.046   | 0.126 |
|                | Reservoir         | Q2VOA             | Week -2      | 9242_A14    | 0.070   | 0.190  | 0.083   | 0.232 |
|                | Reservoir         | Q2VOA             | Week -2      | 9242_B2     | 0.558   | 1.487  | 0.047   | 0.102 |
|                | Reservoir         | Q2VOA             | Week -2      | 9242_E7     | 0.084   | 0.239  | 0.109   | 0.309 |
|                | Reservoir         | Q2VOA             | Week -2      | 9242_G1     | 0.349   | 1.601  | 0.054   | 0.148 |
|                | Reservoir         | Q2VOA             | Week -2      | 9242_H16    | 0.354   | 1.140  | 0.040   | 0.116 |
|                | Reservoir         | Q2VOA             | Week 12      | 9242_12D10  | 0.449   | 1.410  | 0.025   | 0.085 |
|                | Reservoir         | Q2VOA             | Week 12      | 9242_12D16  | 0.347   | 0.898  | 0.033   | 0.090 |
|                | Reservoir         | Q2VOA             | Week 12      | 9242_12E1   | 0.392   | 1.382  | 0.032   | 0.103 |
|                | Reservoir         | Q2VOA             | Week 12      | 9242_12E21  | 0.532   | 1.813  | 0.057   | 0.154 |
|                | Reservoir         | Q2VOA             | Week 12      | 9242_12F9   | 0.552   | 1.445  | 0.036   | 0.081 |
|                | Reservoir         | Q2VOA             | Week 12      | 9242_12G2   | 0.452   | 1.495  | 0.038   | 0.100 |
|                | Reservoir         | Q2VOA             | Week 12      | 9242_12G23  | 0.695   | 1.494  | 0.077   | 0.164 |
|                | Reservoir         | Q2VOA             | Week 12      | 9242_12H20  | 0.212   | 0.702  | 0.117   | 0.264 |
|                | Reservoir         | Q2VOA             | Week 12      | 9242_12L24  | 0.080   | 0.158  | 0.126   | 0.289 |
| Rebound PBMCs  | Rebound Outgrowth | Week 16           | 9242_R2_6    | 0.671       | 2.994   | >50    | >50     |       |
| Rebound PBMCs  | Rebound Outgrowth | Week 16           | 9242_R5_1*   | 0.818       | 1.780   | 31.869 | >50     |       |
| Rebound plasma | Pseudovirus       | Week 16           | 9242_S21_C10 | 0.129       | 0.441   | 0.183  | 3.217   |       |
| 9243           | Reservoir         | Q2VOA             | Week -2      | 9243_B23    | 0.486   | 2.353  | 0.124   | 0.447 |
|                | Reservoir         | Q2VOA             | Week -2      | 9243_C19    | 0.862   | 2.340  | 0.073   | 0.197 |
|                | Reservoir         | Q2VOA             | Week -2      | 9243_C23    | 0.839   | 3.685  | 0.104   | 0.346 |
|                | Reservoir         | Q2VOA             | Week -2      | 9243_E6     | 2.257   | 7.970  | 0.061   | 0.162 |
|                | Reservoir         | Q2VOA             | Week -2      | 9243_E11    | 1.021   | 3.531  | 0.099   | 0.276 |
|                | Reservoir         | Q2VOA             | Week -2      | 9243_E24    | 1.206   | 4.474  | 0.040   | 0.122 |
|                | Reservoir         | Q2VOA             | Week -2      | 9243_F22    | 1.240   | 2.679  | 0.189   | 0.506 |
|                | Reservoir         | Q2VOA             | Week -2      | 9243_M10    | 2.149   | 16.476 | 0.048   | 0.179 |
|                | Reservoir         | Q2VOA             | Week -2      | 9243_019    | 1.073   | 3.636  | 0.045   | 0.157 |
|                | Reservoir         | Q2VOA             | Week 12      | 9243_12D20  | 1.150   | 3.766  | 0.082   | 0.259 |
|                | Reservoir         | Q2VOA             | Week 12      | 9243_12E19  | 1.051   | 3.607  | 0.127   | 0.351 |
|                | Reservoir         | Q2VOA             | Week 12      | 9243_12G2   | 1.093   | 3.617  | 0.078   | 0.172 |
|                | Reservoir         | Q2VOA             | Week 12      | 9243_12K9   | 1.491   | 4.079  | 0.096   | 0.260 |
|                | Reservoir         | Q2VOA             | Week 12      | 9243_12K18  | 1.806   | 4.692  | 0.213   | 0.551 |
|                | Reservoir         | Q2VOA             | Week 12      | 9243_12K24  | 1.358   | 6.023  | 0.135   | 0.443 |
|                | Reservoir         | Q2VOA             | Week 12      | 9243_12L14  | 0.843   | 2.968  | 0.078   | 0.261 |
|                | Reservoir         | Q2VOA             | Week 12      | 9243_12L19  | 1.418   | 4.453  | 0.088   | 0.223 |
|                | Reservoir         | Q2VOA             | Week 12      | 9243_12N5   | 1.709   | 7.948  | 0.177   | 0.588 |
|                | Reservoir         | Q2VOA             | Week 12      | 9243_12S23  | 3.428   | 12.029 | 0.139   | 0.379 |
|                | Reservoir         | Q2VOA             | Week 12      | 9243_12W13  | 0.507   | 1.300  | 0.059   | 0.151 |
| Rebound PBMCs  | Rebound Outgrowth | Week 23           | 9243_R6_12*  | 2.263       | 15.203  | >50    | >50     |       |
| Rebound PBMCs  | Rebound Outgrowth | Week 23           | 9243_R6_13*  | 2.848       | 6.315   | >50    | >50     |       |
| Rebound PBMCs  | Rebound Outgrowth | Week 23           | 9243_R6_23   | 2.764       | 13.946  | >50    | >50     |       |
| Rebound plasma | Pseudovirus       | Week 23           | 9243_S28_G9  | 0.262       | 0.891   | >50    | >50     |       |
| 9244           | Reservoir         | Q2VOA             | Week -2      | 9244_A22    | 0.354   | 1.201  | 0.010   | 0.028 |
|                | Reservoir         | Q2VOA             | Week -2      | 9244_C18    | 0.622   | 1.990  | 0.027   | 0.060 |
|                | Reservoir         | Q2VOA             | Week -2      | 9244_D1     | 0.352   | 1.169  | 0.008   | 0.023 |
|                | Reservoir         | Q2VOA             | Week -2      | 9244_E17    | 0.374   | 1.303  | 0.006   | 0.022 |
|                | Reservoir         | Q2VOA             | Week -2      | 9244_E18    | 0.284   | 0.961  | 0.010   | 0.025 |
|                | Reservoir         | Q2VOA             | Week -2      | 9244_F2     | 0.273   | 0.910  | 0.022   | 0.059 |
|                | Reservoir         | Q2VOA             | Week -2      | 9244_N16    | 0.695   | 3.339  | 0.046   | 0.207 |
|                | Reservoir         | Q2VOA             | Week -2      | 9244_N24    | 0.440   | 2.598  | 0.055   | 0.219 |
|                | Reservoir         | Q2VOA             | Week 12      | 9244_12B17  | 0.111   | 0.459  | 0.024   | 0.077 |
|                | Reservoir         | Q2VOA             | Week 12      | 9244_12B18  | 0.317   | 1.029  | 0.017   | 0.036 |
|                | Reservoir         | Q2VOA             | Week 12      | 9244_12C19  | 0.457   | 3.033  | 0.025   | 0.078 |
|                | Reservoir         | Q2VOA             | Week 12      | 9244_12D11  | 0.367   | 1.262  | 0.031   | 0.082 |
|                | Reservoir         | Q2VOA             | Week 12      | 9244_12E4   | 0.413   | 1.428  | 0.034   | 0.094 |
|                | Reservoir         | Q2VOA             | Week 12      | 9244_12F15  | 0.231   | 1.239  | 0.012   | 0.024 |
|                | Reservoir         | Q2VOA             | Week 12      | 9244_12F23  | 0.847   | 3.553  | 0.026   | 0.085 |
|                | Reservoir         | Q2VOA             | Week 12      | 9244_12G21  | 0.597   | 1.630  | 0.016   | 0.030 |
|                | Reservoir         | Q2VOA             | Week 12      | 9244_12J20  | 0.956   | 2.499  | 0.074   | 0.195 |
|                | Rebound PBMCs     | Rebound Outgrowth | Week 22      | 9244_R1_5*  | 1.342   | 4.524  | 0.185   | 0.601 |
|                | Rebound PBMCs     | Rebound Outgrowth | Week 22      | 9244_R1_13* | 2.076   | 6.512  | 0.225   | 0.568 |
|                | Rebound PBMCs     | Rebound Outgrowth | Week 22      | 9244_R7_7*  | 0.620   | 2.207  | 0.065   | 0.227 |
|                | Rebound PBMCs     | Rebound Outgrowth | Week 22      | 9244_R8_12* | 1.133   | 2.424  | 0.065   | 0.229 |
|                | Rebound PBMCs     | Rebound Outgrowth | Week 22      | 9244_R1_10  | 0.507   | 1.783  | 0.053   | 0.185 |
| Rebound PBMCs  | Rebound Outgrowth | Week 22           | 9244_R1_15   | 0.636       | 2.992   | 0.062  | 0.270   |       |
| Rebound plasma | Pseudovirus       | Week 22           | 9244_S29_B12 | 0.014       | 0.063   | 0.004  | 0.014   |       |
| Rebound plasma | Pseudovirus       | Week 22           | 9244_S33_A8  | 0.074       | 0.314   | 0.015  | 0.065   |       |
| Rebound plasma | Pseudovirus       | Week 22           | 9244_S37_G9  | 0.064       | 0.270   | 0.011  | 0.035   |       |

\* matching SGA



Supplementary Table 4 (continued). Virus neutralization by 3BNC117 and 10-1074.

| Participant    | Source         | Method            | Time Point   | Virus ID      | 3BNC117 |       | 10-1074 |       |
|----------------|----------------|-------------------|--------------|---------------|---------|-------|---------|-------|
|                |                |                   |              |               | IC50    | IC80  | IC50    | IC80  |
| 9245           | Reservoir      | Q2VOA             | Week -2      | 9245_A21      | 0.323   | 0.902 | >50     | >50   |
|                | Reservoir      | Q2VOA             | Week -2      | 9245_B16      | 0.278   | 1.008 | 0.024   | 0.072 |
|                | Reservoir      | Q2VOA             | Week -2      | 9245_B22      | 0.742   | 2.404 | >50     | >50   |
|                | Reservoir      | Q2VOA             | Week -2      | 9245_D19      | 0.570   | 1.913 | >50     | >50   |
|                | Reservoir      | Q2VOA             | Week -2      | 9245_E5       | 0.515   | 1.665 | >50     | >50   |
|                | Reservoir      | Q2VOA             | Week -2      | 9245_H1       | 0.389   | 1.625 | >50     | >50   |
|                | Reservoir      | Pseudovirus       | Week 6       | 9245_PV_B21   | 0.037   | 0.109 | >50     | >50   |
|                | Reservoir      | Pseudovirus       | Week 6       | 9245_PV_E5    | 0.018   | 0.073 | >50     | >50   |
|                | Rebound plasma | Pseudovirus       | Week 6       | 9245_S40_H5   | 5.361   | >50   | >50     | >50   |
| 9246           | Reservoir      | Q2VOA             | Week -2      | 9246_J5       | 0.892   | 4.023 | 0.013   | 0.046 |
|                | Reservoir      | Q2VOA             | Week -2      | 9246_I10      | 0.104   | 0.293 | 0.017   | 0.040 |
|                | Reservoir      | Q2VOA             | Week -2      | 9246_B1_5     | 0.138   | 0.379 | 0.010   | 0.028 |
|                | Reservoir      | Pseudovirus       | Week -2      | 9246_PV_I10   | 0.011   | 0.036 | 0.006   | 0.020 |
|                | Reservoir      | Q2VOA             | Week 12      | 9246_12Q21    | 0.595   | 2.661 | 0.006   | 0.021 |
|                | Reservoir      | Q2VOA             | Week 12      | 9246_12P1     | 0.179   | 0.601 | 0.055   | 0.143 |
|                | Reservoir      | Q2VOA             | Week 12      | 9246_12B1_2   | 0.062   | 0.413 | 0.014   | 0.048 |
|                | Reservoir      | Pseudovirus       | Week 12      | 9246_PV_12K21 | 0.066   | 0.381 | 0.005   | 0.013 |
|                | Reservoir      | Pseudovirus       | Week 12      | 9246_PV_12P1  | 0.023   | 0.068 | 0.008   | 0.024 |
|                | Rebound plasma | Pseudovirus       | Week 20      | 9246_S41_G2   | 0.047   | 0.130 | >50     | >50   |
|                | Rebound plasma | Pseudovirus       | Week 20      | 9246_S44_A4   | 0.020   | 0.068 | >50     | >50   |
| Rebound plasma | Pseudovirus    | Week 20           | 9246_S42_F4  | 0.017         | 0.059   | >50   | >50     |       |
| 9247           | Rebound plasma | Pseudovirus       | Week 27      | 9247_S63_C5   | 0.012   | 0.040 | 13.226  | >50   |
|                | Rebound plasma | Pseudovirus       | Week 27      | 9247_S65_E2   | 0.017   | 0.055 | 48.848  | >50   |
| 9241           | Reservoir      | Q2VOA             | Week -2      | 9241_B3       | 0.082   | 0.285 | 0.047   | 0.170 |
|                | Reservoir      | Q2VOA             | Week -2      | 9241_D17      | 0.659   | 1.740 | 0.306   | 0.789 |
|                | Reservoir      | Q2VOA             | Week -2      | 9241_D21      | 1.003   | 3.393 | 0.100   | 0.263 |
|                | Reservoir      | Q2VOA             | Week -2      | 9241_F12      | 0.205   | 0.652 | 0.126   | 0.334 |
|                | Reservoir      | Q2VOA             | Week -2      | 9241_F19      | 0.723   | 2.304 | 0.123   | 0.343 |
|                | Reservoir      | Q2VOA             | Week -2      | 9241_G23      | 0.130   | 0.289 | 0.284   | 0.735 |
|                | Reservoir      | Q2VOA             | Week -2      | 9241_G8       | 0.641   | 2.124 | 0.284   | 0.778 |
|                | Reservoir      | Q2VOA             | Week -2      | 9241_N8       | 0.629   | 1.630 | 0.278   | 0.890 |
|                | Reservoir      | Q2VOA             | Week -2      | 9241_N14      | 0.476   | 1.253 | 0.117   | 0.311 |
|                | Reservoir      | Q2VOA             | Week -2      | 9241_Q12      | 0.091   | 0.293 | 0.196   | 0.439 |
|                | Reservoir      | Q2VOA             | Week 12      | 9241_12BW23   | 0.242   | 0.575 | 0.074   | 0.232 |
|                | Reservoir      | Q2VOA             | Week 12      | 9241_12S21    | 0.612   | 1.626 | 0.216   | 0.671 |
|                | Reservoir      | Q2VOA             | Week 12      | 9241_12X1     | 0.573   | 1.521 | 0.125   | 0.271 |
|                | Reservoir      | Q2VOA             | Week 12      | 9241_12Y6     | 0.571   | 1.547 | 0.175   | 0.462 |
|                | Reservoir      | Q2VOA             | Week 12      | 9241_12Y13    | 0.727   | 2.473 | 0.018   | 0.050 |
|                | Rebound PBMCs  | Rebound Outgrowth | Week 22      | 9241_R1_8*    | 0.854   | 2.206 | 0.682   | 1.777 |
|                | Rebound PBMCs  | Rebound Outgrowth | Week 22      | 9241_R2_1     | 0.828   | 2.228 | 0.281   | 0.729 |
|                | Rebound PBMCs  | Rebound Outgrowth | Week 22      | 9241_R2_2     | 1.126   | 2.921 | 0.611   | 1.593 |
| Rebound plasma | Pseudovirus    | Week 22           | 9241_S68_G11 | 0.106         | 0.371   | 0.058 | 0.207   |       |
| Rebound plasma | Pseudovirus    | Week 22           | 9241_S68_E7  | 0.060         | 0.215   | 0.040 | 0.173   |       |
| Rebound plasma | Pseudovirus    | Week 22           | 9241_S64_C2  | 0.136         | 0.470   | 0.160 | 0.545   |       |
| 9248           | Reservoir      | Q2VOA             | Week -2      | 9248_D17      | 1.419   | 3.633 | 1.430   | 3.700 |
|                | Reservoir      | Q2VOA             | Week -2      | 9248_D20      | 0.397   | 0.829 | 0.051   | 0.111 |
|                | Reservoir      | Q2VOA             | Week -2      | 9248_D22      | 0.942   | 4.149 | 0.436   | 1.133 |
|                | Reservoir      | Q2VOA             | Week -2      | 9248_F1       | 0.802   | 3.502 | 0.414   | 1.856 |
|                | Reservoir      | Q2VOA             | Week -2      | 9248_F2       | 1.165   | 5.306 | 0.543   | 1.830 |
|                | Reservoir      | Q2VOA             | Week -2      | 9248_F14      | 0.883   | 4.035 | 0.329   | 1.107 |
|                | Reservoir      | Q2VOA             | Week -2      | 9248_F20      | 1.039   | 3.430 | 0.317   | 1.538 |
|                | Reservoir      | Q2VOA             | Week -2      | 9248_G8       | 1.152   | 2.371 | 1.507   | 3.694 |
|                | Reservoir      | Q2VOA             | Week -2      | 9248_Q5       | 0.888   | 2.973 | 0.576   | 1.990 |
|                | Rebound PBMCs  | Rebound Outgrowth | Week 12      | 9248_R5_5*    | 0.951   | 3.344 | >50     | >50   |
|                | Rebound PBMCs  | Rebound Outgrowth | Week 12      | 9248_R3_20    | 0.918   | 2.868 | 0.405   | 1.265 |
|                | Rebound PBMCs  | Rebound Outgrowth | Week 12      | 9248_R4_1     | 0.235   | 0.755 | 0.105   | 0.280 |
|                | Rebound PBMCs  | Rebound Outgrowth | Week 12      | 9248_R6_2     | 1.009   | 7.611 | 0.270   | 2.065 |
|                | Rebound PBMCs  | Rebound Outgrowth | Week 12      | 9248_R6_3     | 0.595   | 3.035 | 0.640   | 2.218 |
| Rebound plasma | Pseudovirus    | Week 12           | 9248_S59_B5  | 0.047         | 0.159   | >50   | >50     |       |
| 9249           | Reservoir      | Q2VOA             | Week -2      | 9209_C7       | 0.842   | 3.901 | 0.141   | 0.381 |
|                | Reservoir      | Q2VOA             | Week -2      | 9209_G21      | >50     | >50   | >50     | >50   |
|                | Reservoir      | Q2VOA             | Week -2      | 9209_H3       | 1.463   | 4.972 | >50     | >50   |
|                | Reservoir      | Q2VOA             | Week -2      | 9209_I12      | 0.236   | 0.807 | >50     | >50   |
|                | Rebound PBMCs  | Rebound Outgrowth | Week 4       | 9209_R4_5*    | >50     | >50   | >50     | >50   |
|                | Rebound PBMCs  | Rebound Outgrowth | Week 4       | 9209_R4_7*    | >50     | >50   | >50     | >50   |
|                | Rebound plasma | Pseudovirus       | Week 4       | 9209_S51_F4   | 0.061   | 0.829 | >50     | >50   |
|                | Rebound plasma | Pseudovirus       | Week 4       | 9209_S52_G6   | 0.078   | 1.638 | >50     | >50   |
| Rebound plasma | Pseudovirus    | Week 4            | 9209_S47_B1  | >50           | >50     | >50   | >50     |       |

\* matching SGA

**Supplementary Table 4 (continued). Virus neutralization by 3BNC117 and 10-1074.**

| Participant    | Source         | Method      | Time Point     | Virus ID       | 3BNC117 |        | 10-1074 |       |
|----------------|----------------|-------------|----------------|----------------|---------|--------|---------|-------|
|                |                |             |                |                | IC50    | IC80   | IC50    | IC80  |
| 9250           | Reservoir      | Q2VOA       | Week -2        | 9250_D23       | 0.371   | 1.303  | 1.017   | 3.517 |
|                | Reservoir      | Q2VOA       | Week -2        | 9250_F9        | 0.953   | 6.605  | 0.399   | 3.027 |
|                | Reservoir      | Q2VOA       | Week -2        | 9250_F10       | 0.442   | 2.060  | 0.360   | 1.662 |
|                | Reservoir      | Q2VOA       | Week -2        | 9250_F11       | 0.815   | 2.680  | 0.681   | 2.224 |
|                | Reservoir      | Q2VOA       | Week -2        | 9250_H19/A21   | 0.619   | 3.008  | 0.478   | 1.791 |
|                | Reservoir      | Q2VOA       | Week -2        | 9250_M1        | 0.626   | 2.833  | 0.852   | 4.228 |
|                | Reservoir      | Pseudovirus | Week -2        | 9250_PV_F17    | 0.034   | 0.141  | 0.047   | 0.282 |
|                | Reservoir      | Pseudovirus | Week -2        | 9250_PV_L5     | 0.022   | 0.089  | 0.035   | 0.208 |
|                | Rebound plasma | Pseudovirus | Week 8         | 9250_S48_B7    | 0.616   | 1.570  | >50     | >50   |
|                | Rebound plasma | Pseudovirus | Week 8         | 9250_S48_G10   | 0.835   | 3.670  | >50     | >50   |
| Rebound plasma | Pseudovirus    | Week 8      | 9250_S50_E9    | 0.334          | 1.435   | >50    | >50     |       |
| 9251           | Reservoir      | Q2VOA       | Week -2        | 9251_G5        | 0.840   | 2.940  | 0.049   | 0.164 |
|                | Reservoir      | Q2VOA       | Week -2        | 9251_Y8        | 0.999   | 3.742  | 0.017   | 0.040 |
|                | Reservoir      | Q2VOA       | Week -2        | 9251_V18/AB24  | 1.301   | 8.811  | 0.049   | 0.195 |
|                | Reservoir      | Q2VOA       | Week -2        | 9251_AB21      | 10.815  | >50    | 0.018   | 0.040 |
|                | Reservoir      | Pseudovirus | Week -2        | 9251_PV_G5     | 0.070   | 0.231  | 0.007   | 0.021 |
|                | Rebound plasma | Pseudovirus | Week 8         | 9251_S60_H12   | 5.821   | >50    | >50     | >50   |
|                | Rebound plasma | Pseudovirus | Week 8         | 9251_S60_H3    | 6.690   | >50    | >50     | >50   |
| Rebound plasma | Pseudovirus    | Week 8      | 9251_S60_G11   | 4.079          | >50     | >50    | >50     |       |
| 9252           | Reservoir      | Q2VOA       | Week -2        | 9252_D17       | 0.275   | 1.974  | 0.056   | 0.332 |
|                | Reservoir      | Q2VOA       | Week -2        | 9252_F22       | 0.365   | 1.232  | 0.096   | 0.272 |
|                | Reservoir      | Q2VOA       | Week -2        | 9252_F24       | 0.447   | 1.555  | 0.111   | 0.380 |
|                | Reservoir      | Q2VOA       | Week -2        | 9252_L4        | 0.566   | 1.557  | 0.120   | 0.336 |
|                | Reservoir      | Q2VOA       | Week -2        | 9252_R3        | 0.583   | 1.800  | 0.142   | 0.369 |
|                | Reservoir      | Pseudovirus | Week -2        | 9252_PV_E14    | 0.054   | 0.179  | 0.026   | 0.088 |
|                | Reservoir      | Pseudovirus | Week -2        | 9252_PV_H7     | 0.061   | 0.268  | 0.017   | 0.083 |
|                | Reservoir      | Pseudovirus | Week 12        | 9252_PV_12Q1   | 0.047   | 0.196  | 0.025   | 0.104 |
|                | Rebound plasma | Pseudovirus | Week 22        | 9252_PV_S70_D5 | 0.026   | 0.072  | >50     | >50   |
| Rebound plasma | Pseudovirus    | Week 22     | 9252_PV_S71_D3 | 0.024          | 0.065   | >50    | >50     |       |
| 9253           | Reservoir      | Q2VOA       | Week -2        | 9253_H9        | 0.515   | 4.434  | 0.032   | 0.077 |
|                | Reservoir      | Q2VOA       | Week -2        | 9253_H14       | 0.062   | 0.236  | 0.058   | 0.224 |
|                | Reservoir      | Q2VOA       | Week -2        | 9253_I8        | 0.256   | 0.923  | 0.010   | 0.037 |
|                | Reservoir      | Q2VOA       | Week -2        | 9253_I11       | 0.985   | 9.621  | 0.382   | 1.776 |
|                | Reservoir      | Q2VOA       | Week -2        | 9253_J18       | 5.714   | 16.850 | >50     | >50   |
|                | Reservoir      | Q2VOA       | Week -2        | 9253_K5        | 24.827  | >50    | 0.535   | 2.386 |
|                | Reservoir      | Q2VOA       | Week -2        | 9253_K6        | 10.219  | >50    | 2.042   | 8.036 |
|                | Reservoir      | Pseudovirus | Week -2        | 9253_PV_F22    | 0.235   | 1.012  | 0.447   | 2.835 |
|                | Reservoir      | Pseudovirus | Week -2        | 9253_PV_J18    | 0.266   | 0.891  | >50     | >50   |
|                | Rebound plasma | Pseudovirus | Week 6         | 9253_S61_B2    | 0.349   | 1.777  | >50     | >50   |
|                | Rebound plasma | Pseudovirus | Week 6         | 9253_S61_B10   | 0.325   | 1.108  | >50     | >50   |
|                | Rebound plasma | Pseudovirus | Week 6         | 9253_S61E9     | 0.249   | 1.169  | >50     | >50   |
| 9254           | Reservoir      | Q2VOA       | Week -2        | 9254_AH4       | 0.299   | 0.635  | 0.164   | 0.371 |
|                | Reservoir      | Q2VOA       | Week -2        | 9254_AF2/E19   | 0.082   | 0.292  | 0.057   | 0.248 |
|                | Reservoir      | Q2VOA       | Week 12        | 9254_12A5      | 0.126   | 0.372  | 0.083   | 0.164 |
|                | Reservoir      | Q2VOA       | Week 12        | 9254_12D15     | 0.139   | 0.466  | 0.085   | 0.235 |
|                | Reservoir      | Q2VOA       | Week 12        | 9254_12A4      | 0.175   | 0.482  | 0.109   | 0.293 |
|                | Reservoir      | Q2VOA       | Week 12        | 9254_12I7      | 0.095   | 0.316  | 0.064   | 0.178 |
|                | Reservoir      | Pseudovirus | Week 12        | 9254_PV_12A5   | 0.013   | 0.044  | 0.014   | 0.048 |
|                | Reservoir      | Pseudovirus | Week 12        | 9254_PV_12A13  | 0.020   | 0.056  | 0.030   | 0.084 |
| 9255           | Reservoir      | Q2VOA       | Week -2        | 9255_A1        | 0.225   | 1.022  | 0.003   | 0.010 |
|                | Reservoir      | Q2VOA       | Week -2        | 9255_A23       | 0.186   | 0.624  | 0.003   | 0.014 |
|                | Reservoir      | Q2VOA       | Week -2        | 9255_F15       | 0.460   | 2.132  | 0.019   | 0.067 |
|                | Reservoir      | Q2VOA       | Week -2        | 9255_H19       | 0.285   | 0.980  | 0.015   | 0.052 |
|                | Reservoir      | Q2VOA       | Week 12        | 9255_12I24     | 0.145   | 0.399  | 0.002   | 0.008 |
|                | Reservoir      | Q2VOA       | Week 12        | 9255_12F12     | 0.602   | 1.818  | 0.020   | 0.058 |
|                | Reservoir      | Q2VOA       | Week 12        | 9255_12E16     | 0.109   | 0.468  | 0.003   | 0.009 |
|                | Reservoir      | Q2VOA       | Week 12        | 9255_12B6      | 0.218   | 1.029  | 0.001   | 0.005 |
|                | Reservoir      | Q2VOA       | Week 12        | 9255_12K22     | 0.112   | 0.522  | 0.017   | 0.056 |
|                | Reservoir      | Pseudovirus | Week -2        | 9255_PV_A23    | 0.029   | 0.095  | 0.001   | 0.003 |
| Reservoir      | Pseudovirus    | Week -2     | 9255_PV_B1     | 0.026          | 0.144   | 0.002  | 0.007   |       |

**Supplementary Table 5. Pre-Infusion IgG neutralizing activity**

| Pseudovirus         | 9241               |                    | 9242             |                  | 9243             |                  | 9244             |                  | 9245             |                  | 9246             |                  | 9247             |                  | 9251             |                  | 9252             |                  | 9254             |                  | 9255             |                  |
|---------------------|--------------------|--------------------|------------------|------------------|------------------|------------------|------------------|------------------|------------------|------------------|------------------|------------------|------------------|------------------|------------------|------------------|------------------|------------------|------------------|------------------|------------------|------------------|
|                     | IC <sub>50</sub> * | IC <sub>80</sub> * | IC <sub>50</sub> | IC <sub>80</sub> |
| <b>Q769.d22</b>     | >500               | >500               | >500             | >500             | >500             | >500             | >500             | >500             | >500             | >500             | >500             | >500             | >500             | >500             | >500             | >500             | >500             | >500             | >500             | >500             | >500             | >500             |
| <b>TRO.11</b>       | >500               | >500               | >500             | >500             | >500             | >500             | >500             | >500             | >500             | >500             | >500             | >500             | >500             | >500             | >500             | >500             | >500             | >500             | >500             | >500             | >500             | >500             |
| <b>Q259.d2.17</b>   | >500               | >500               | >500             | >500             | >500             | >500             | >500             | >500             | >500             | >500             | >500             | >500             | >500             | >500             | >500             | >500             | >500             | >500             | >500             | >500             | >500             | >500             |
| <b>25710-2.43</b>   | >500               | >500               | >500             | >500             | >500             | >500             | >500             | >500             | >500             | >500             | >500             | >500             | >500             | >500             | <b>474</b>       | >500             | >500             | >500             | >500             | >500             | >500             | >500             |
| <b>YU2.DG</b>       | >500               | >500               | >500             | >500             | >500             | >500             | >500             | >500             | >500             | >500             | >500             | >500             | >500             | >500             | >500             | >500             | >500             | >500             | >500             | >500             | <b>140</b>       | >500             |
| <b>ZM135M.PL10a</b> | >500               | >500               | >500             | >500             | >500             | >500             | >500             | >500             | >500             | >500             | >500             | >500             | >500             | >500             | >500             | >500             | >500             | >500             | >500             | >500             | >500             | >500             |
| <b>CNE8</b>         | >500               | >500               | >500             | >500             | >500             | >500             | >500             | >500             | >500             | >500             | >500             | >500             | >500             | >500             | >500             | >500             | >500             | >500             | >500             | >500             | >500             | >500             |
| <b>Q842.d12</b>     | >500               | >500               | >500             | >500             | >500             | >500             | >500             | >500             | >500             | >500             | >500             | >500             | >500             | >500             | >500             | >500             | >500             | >500             | >500             | >500             | >500             | >500             |
| <b>X1632_S2_B10</b> | >500               | >500               | >500             | >500             | >500             | >500             | >500             | >500             | >500             | >500             | >500             | >500             | >500             | >500             | <b>453</b>       | >500             | >500             | >500             | >500             | >500             | >500             | >500             |
| <b>Ce1176_A3</b>    | >500               | >500               | >500             | >500             | >500             | >500             | >500             | >500             | >500             | >500             | >500             | >500             | >500             | >500             | >500             | >500             | >500             | >500             | >500             | >500             | >500             | >500             |
| <b>246-F3_C10_2</b> | >500               | >500               | >500             | >500             | >500             | >500             | >500             | >500             | >500             | >500             | >500             | >500             | >500             | >500             | >500             | >500             | >500             | >500             | >500             | >500             | >500             | >500             |
| <b>CNE55</b>        | >500               | >500               | >500             | >500             | >500             | >500             | >500             | >500             | >500             | >500             | >500             | >500             | >500             | >500             | >500             | >500             | >500             | >500             | >500             | >500             | >500             | >500             |
| <b>MuLV</b>         | >500               | >500               | >500             | >500             | >500             | >500             | >500             | >500             | >500             | >500             | >500             | >500             | >500             | >500             | >500             | >500             | >500             | >500             | >500             | >500             | >500             | >500             |

\* µg/ml
